# Supplementary material for: Space–Time Covariation of Mortality with Temperature: A Systematic Study of Deaths in France, 1968–2009
Source: PubMed Central journal article supplement (PMC4492259; doi:10.1289/ehp.1307771), 2015-03-23
Supplement: ehp.1307771.s001.acco.pdf [file ehp.1307771.s001.acco.pdf]

**Note to Readers:** *EHP* strives to ensure that all journal content is accessible to all readers. However, some figures and Supplemental Material published in *EHP* articles may not conform to 508 standards due to the complexity of the information being presented. If you need assistance accessing journal content, please contact [ehp508@niehs.nih.gov](mailto:ehp508@niehs.nih.gov). Our staff will work with you to assess and meet your accessibility needs within 3 working days.

## Supplemental Material

### **Space–Time Covariation of Mortality with Temperature: A Systematic Study of Deaths in France, 1968–2009**

Nicolas Todd<sup>1</sup> and Alain-Jacques Valleron<sup>1,2</sup>

#### Table of Contents

#### **Sensitivity analyses**

##### **Model 1: 2df/y**

**Figure S1.** Comparison of MMT obtained with 1 and 2 df/y for  $s(t)$  for the 211 squares with > 7,500 deaths and a U/J-shaped curve for all three periods. The full line figures the equality between the MMT estimates.

##### **Model 2: 4df/y and lagged temperature**

**Figure S2.** Derivation of the temperature-mortality relation with Model 2 in square 27-17 of the grid. Top panels: left  $s_{1a}(T_t)$ , right  $s_{1b}(T_{t-1;t-6})$ . Bottom panel: the final temperature-mortality curve  $(s_{1a}(T)+s_{1b}(T))/(s_{1a}(\text{MMT})+s_{1b}(\text{MMT}))$ .

**Figure S3.** Comparison of MMT estimates obtained with Model 2 (4df/year + lagged effect of temperature) with those presented in the paper. Two separate analyses were done: The left panel presents the results obtained on the squares with > 22,500 deaths and U/J curves ( $n=225$ ). The right panel presents the results obtained on the squares with > 50,000 deaths and U/J squares ( $n=107$ ) 107 U/J curves.

# Sensitivity analyses

## Model 1: 2df/y

Testing for the sensitivity to the degree of freedom allowed to the smooth function of time was conducted by fitting a model with 2 df/y for  $s(t)$  in the by period analysis (see also Model 2 where 4df/year were used)

As shown in the figure below, the new MMT values found at each of the 3 periods were close from the values obtained with the model with 1 df/year presented in the paper.

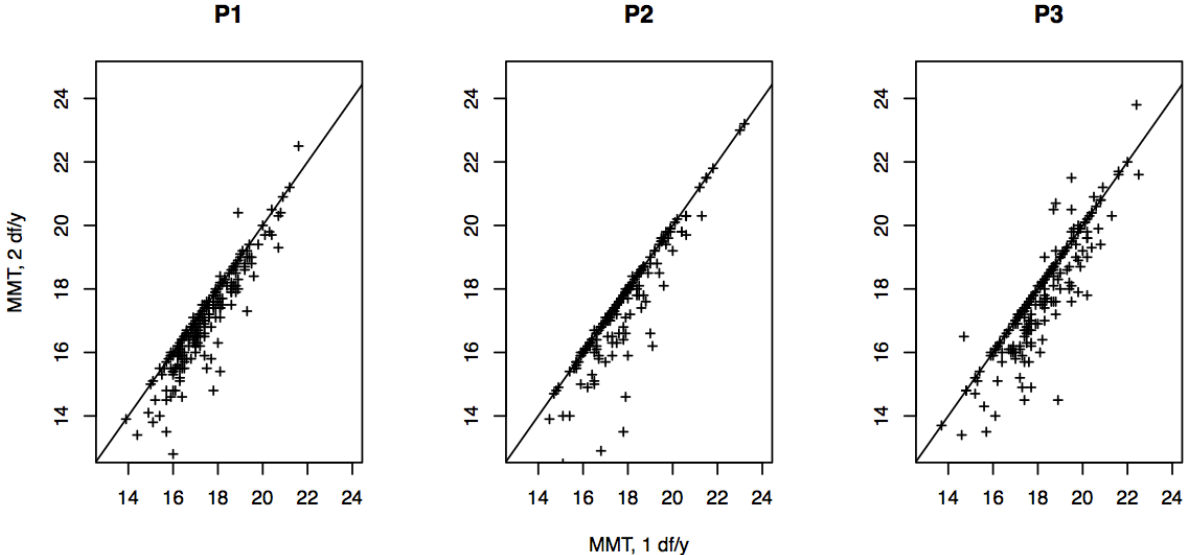

**Figure S1.** Comparison of MMT obtained with 1 and 2 df/y for  $s(t)$  for the 211 squares with  $> 7,500$  deaths and a U/J-shaped curve for all three periods. The full line figures the equality between the MMT estimates.

## Model 2: 4df/y and lagged temperature

In model 2, the possible lagged effects of temperature on mortality was adjusted for each square. The effects of  $T_t$  (temperature of the day) and  $T_{t-1;t-6}$  (mean temperature over the past 6 days) were modelled separately.

One example of the estimation of the temperature-mortality relationship is shown on Figure S3.

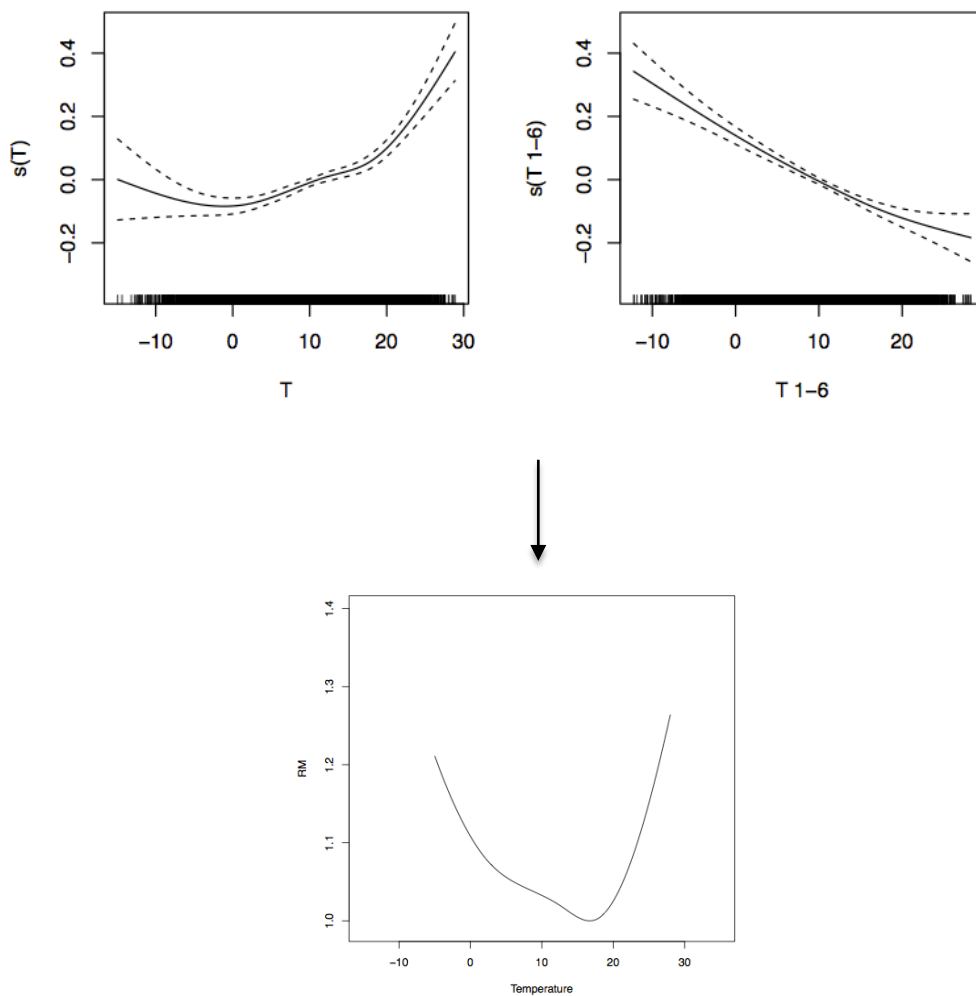

**Figure S2.** Derivation of the temperature-mortality relation with Model 2 in square 27-17 of the grid. Top panels: left  $s_{1a}(T_t)$ , right  $s_{1b}(T_{t-1;t-6})$ . Bottom panel: the final temperature-mortality curve  $(s_{1a}(T)+s_{1b}(T))/(s_{1a}(MMT)+s_{1b}(MMT))$ .

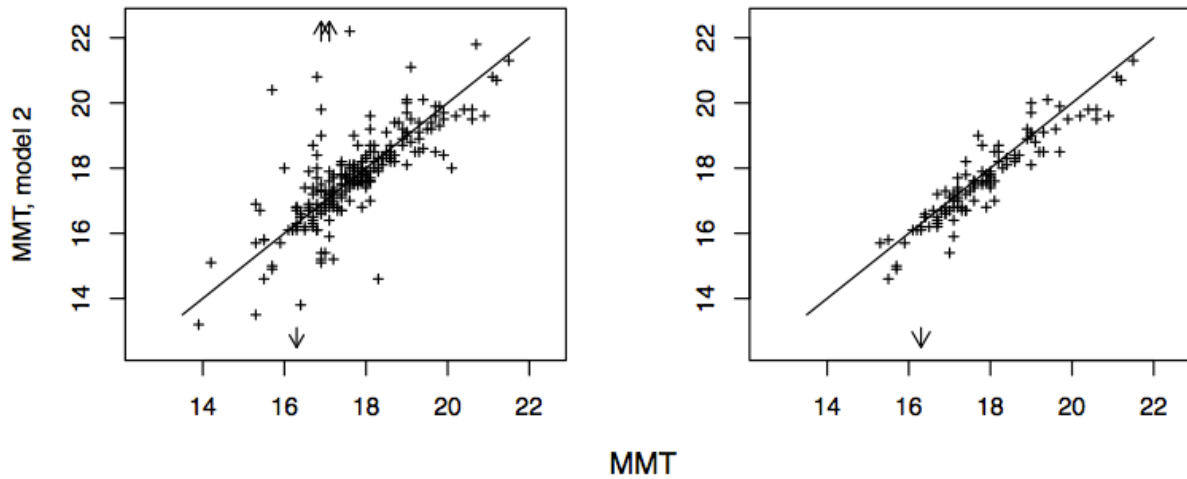

**Figure S3.** Comparison of MMT estimates obtained with Model 2 (4df/year + lagged effect of temperature) with those presented in the paper. Two separate analyses were done: The left panel presents the results obtained on the squares with > 22,500 deaths and U/J curves (n=225 ). The right panel presents the results obtained on the squares with > 50,000 deaths and U/J squares (n=107 ) 107 U/J curves.
